# Supplementary material for: Luminescent gels by self-assembling platinum complexes
Source: Royal Society of Chemistry journal article supplement (doi:10.1039/c2dt30369h), 2012-01-01
Supplement: c2dt30369h.pdf [file c2dt30369h.pdf]

## Supplementary Information

### Luminescent gels by self-assembling platinum complexes

Naveen Kumar Allampally, Cristian A. Strassert\*, Luisa De Cola\*

Received (in XXX, XXX) Xth XXXXXXXXXX 20XX, Accepted Xth XXXXXXXXXX 20XX

DOI: 10.1039/b000000x

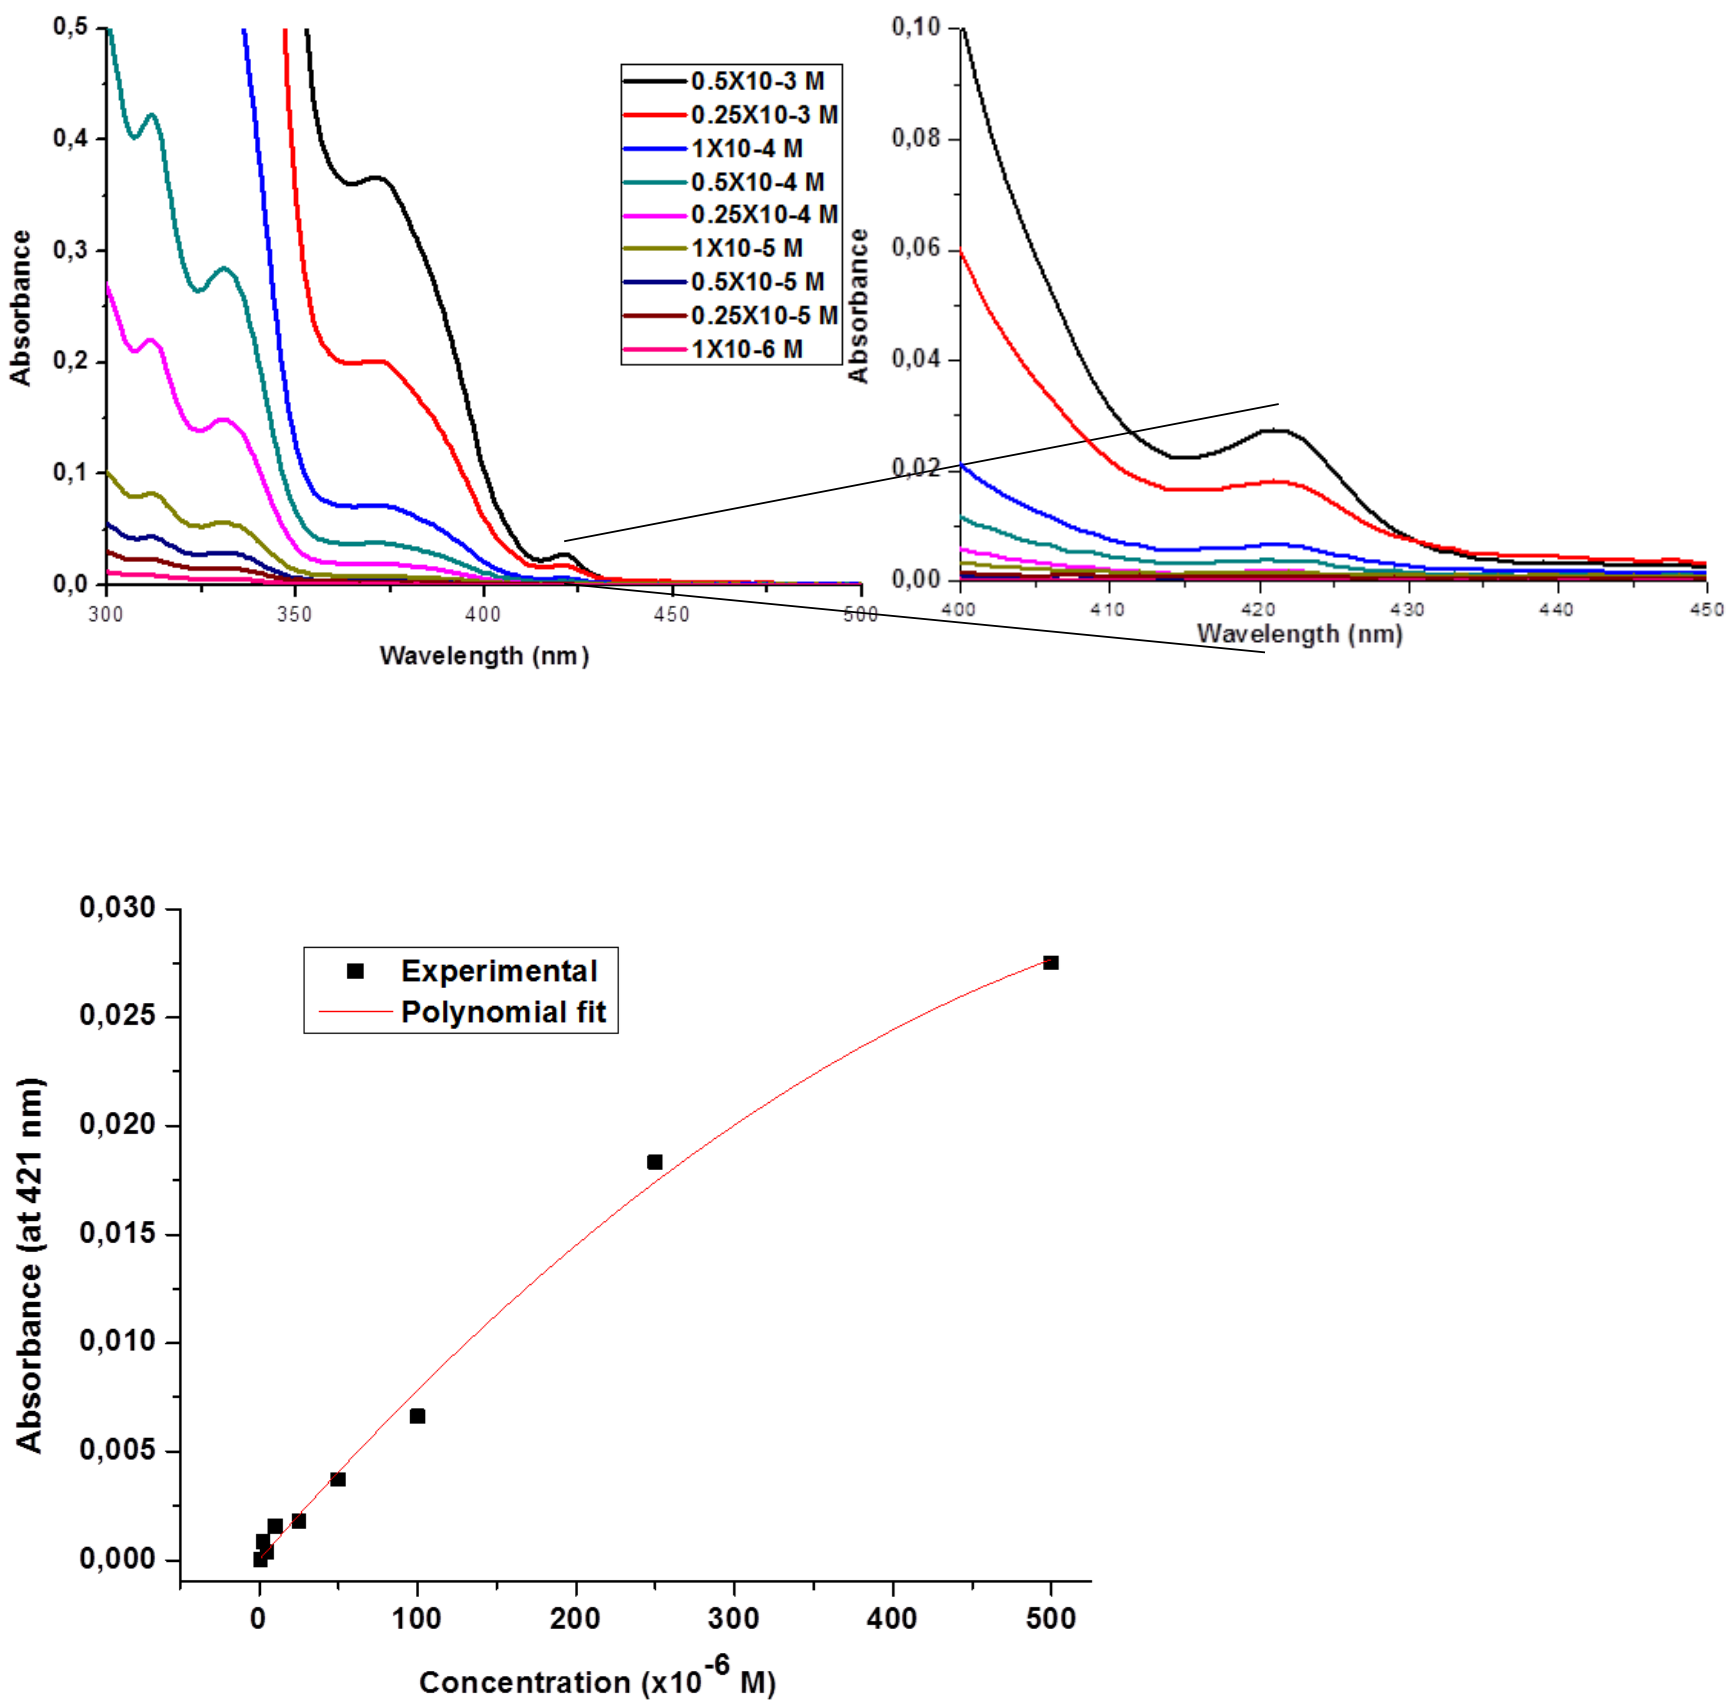

**Figure S1.** Absorption spectra at different concentration in dichloromethane solution of complex **4** (notice the concentration dependent<sup>1</sup>MMLCT band at 420 nm) (top). Plot of the absorbance vs concentration for complex **4** (bottom).

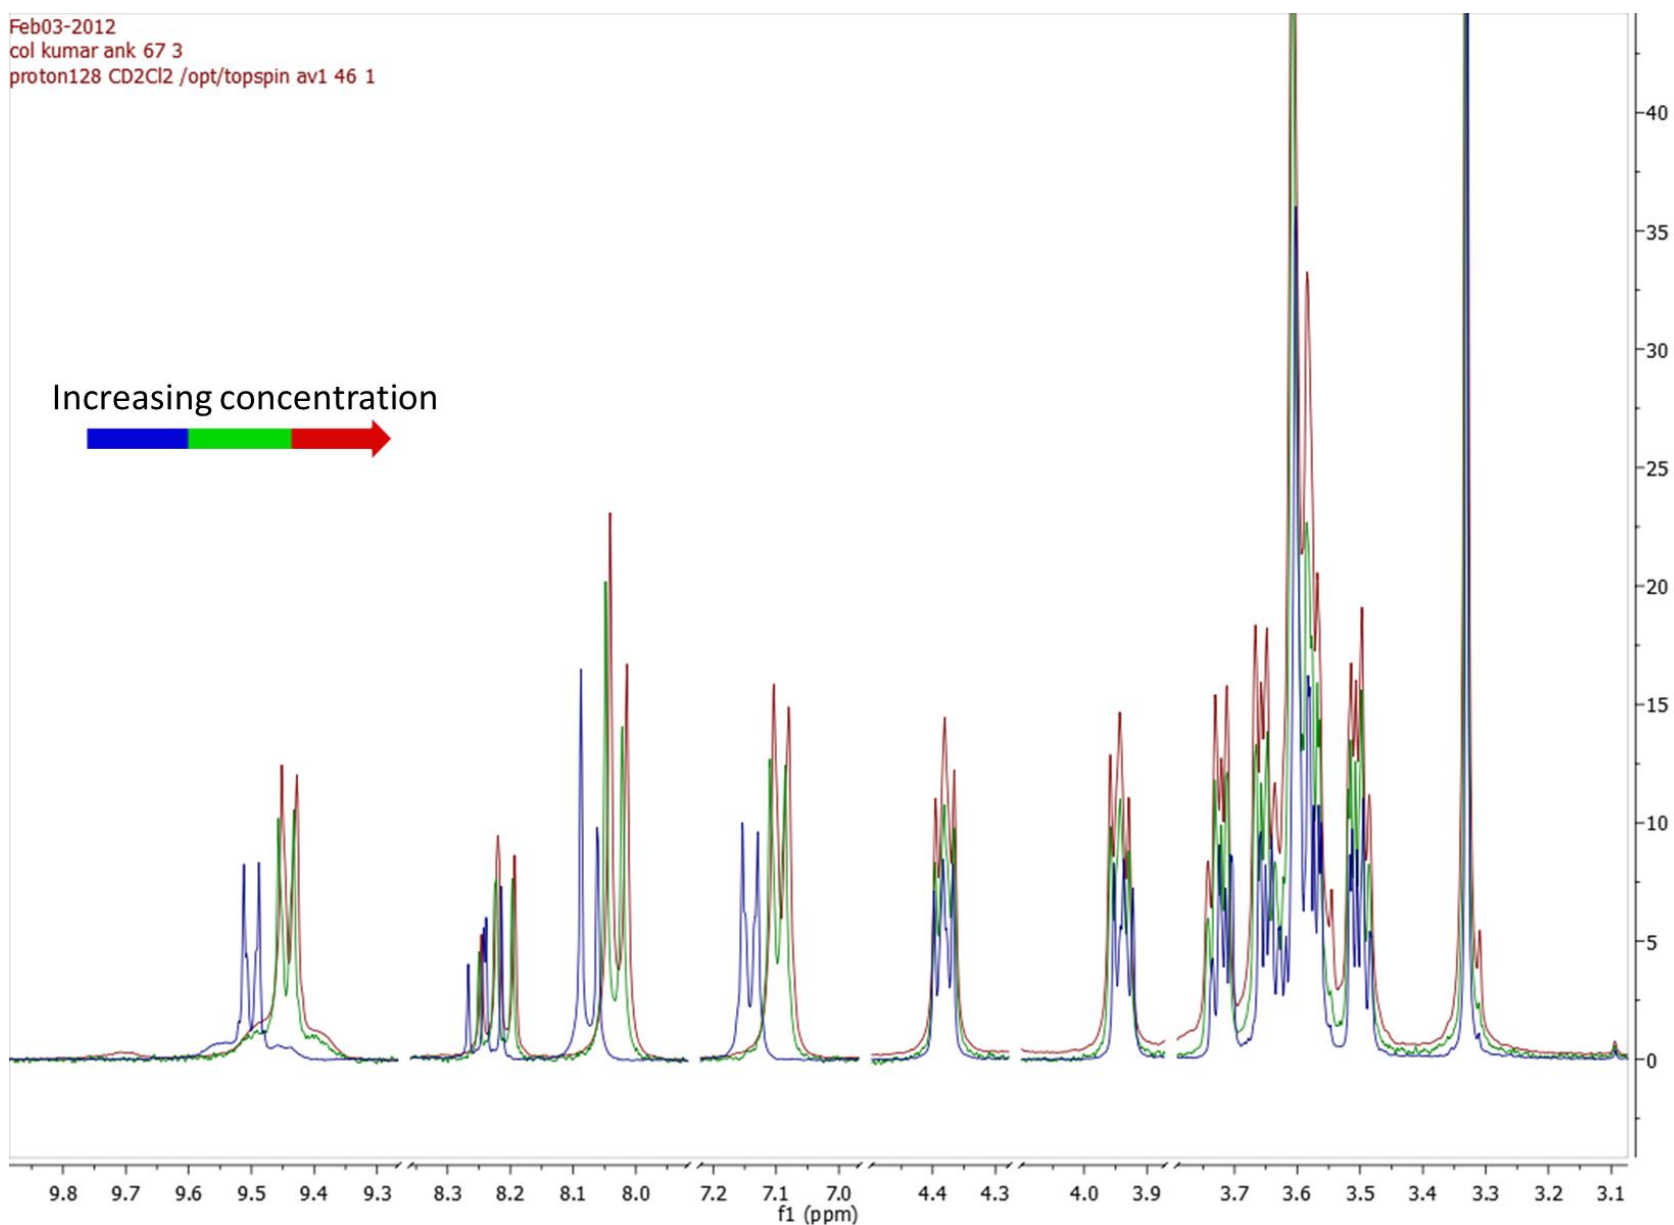

**Figure S2.** Concentration dependent  $^1\text{H}$ NMR ( $\text{CD}_2\text{Cl}_2$ , aromatic region) of complex **4** (blue 9.6 mM, green 19.2 mM and red 28.8mM).

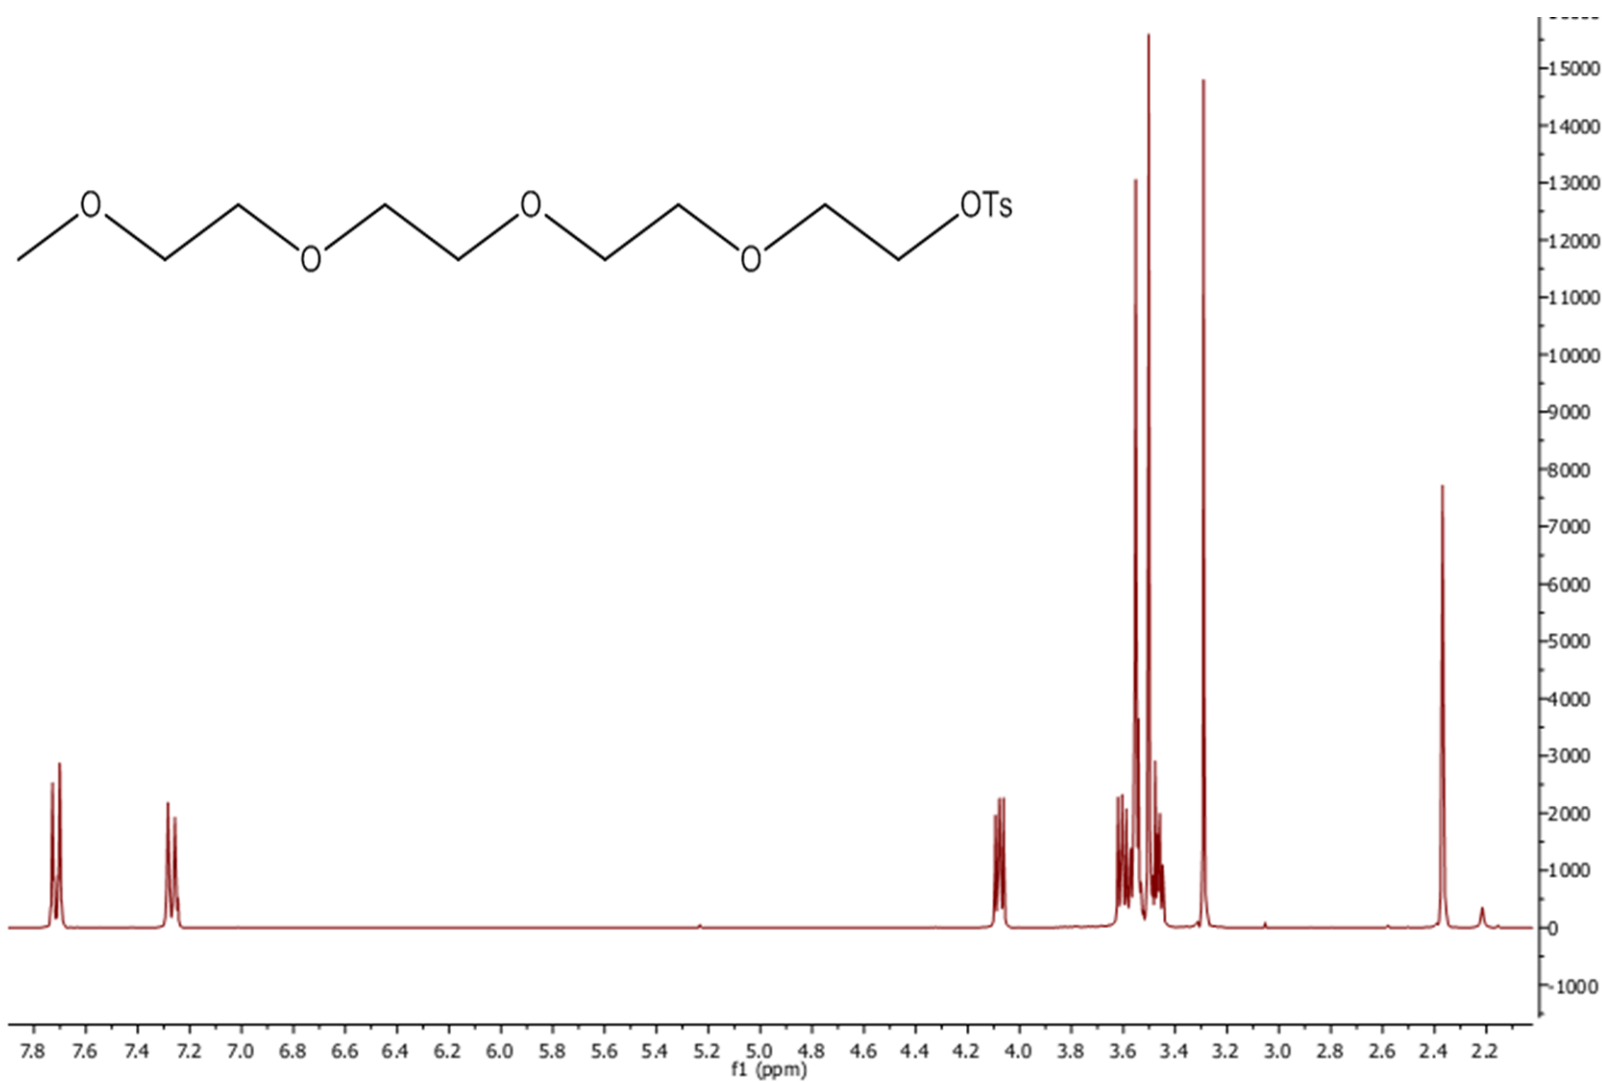

**Figure S3.**  $^1\text{H}$ NMR of compound **1** in  $\text{CDCl}_3$ .

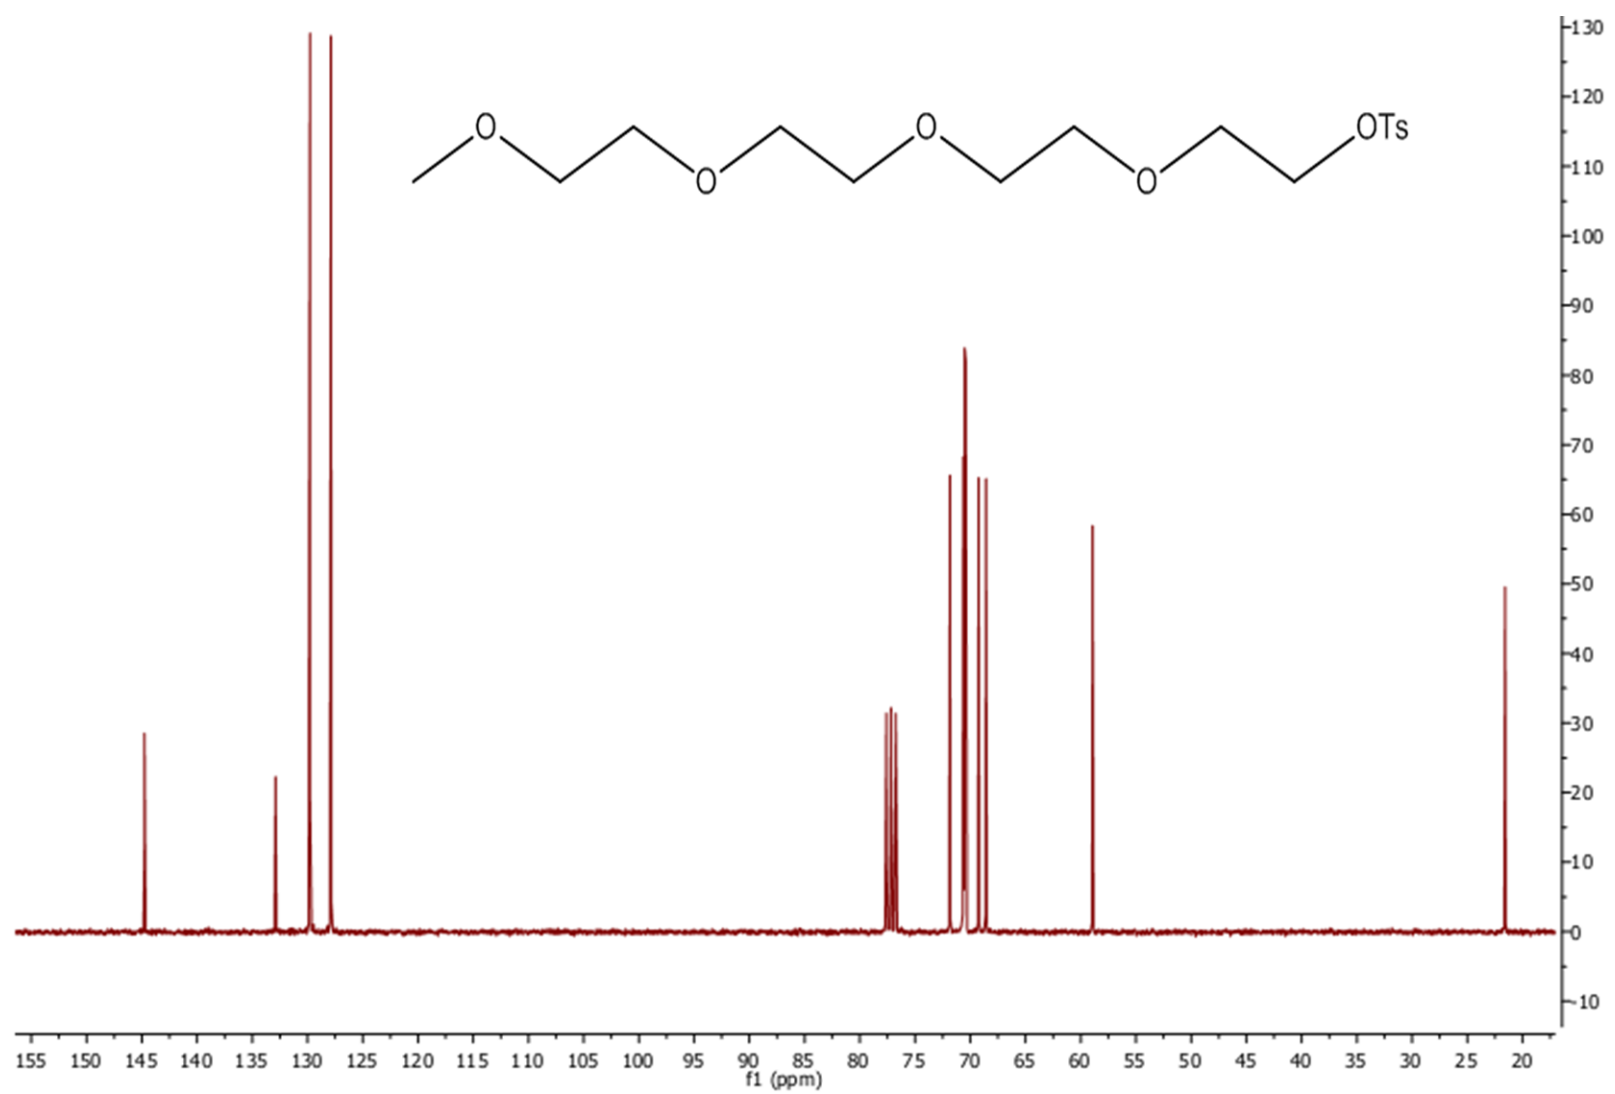

**Figure S4.**  $^{13}\text{C}$ NMR of compound **1** in  $\text{CDCl}_3$ .

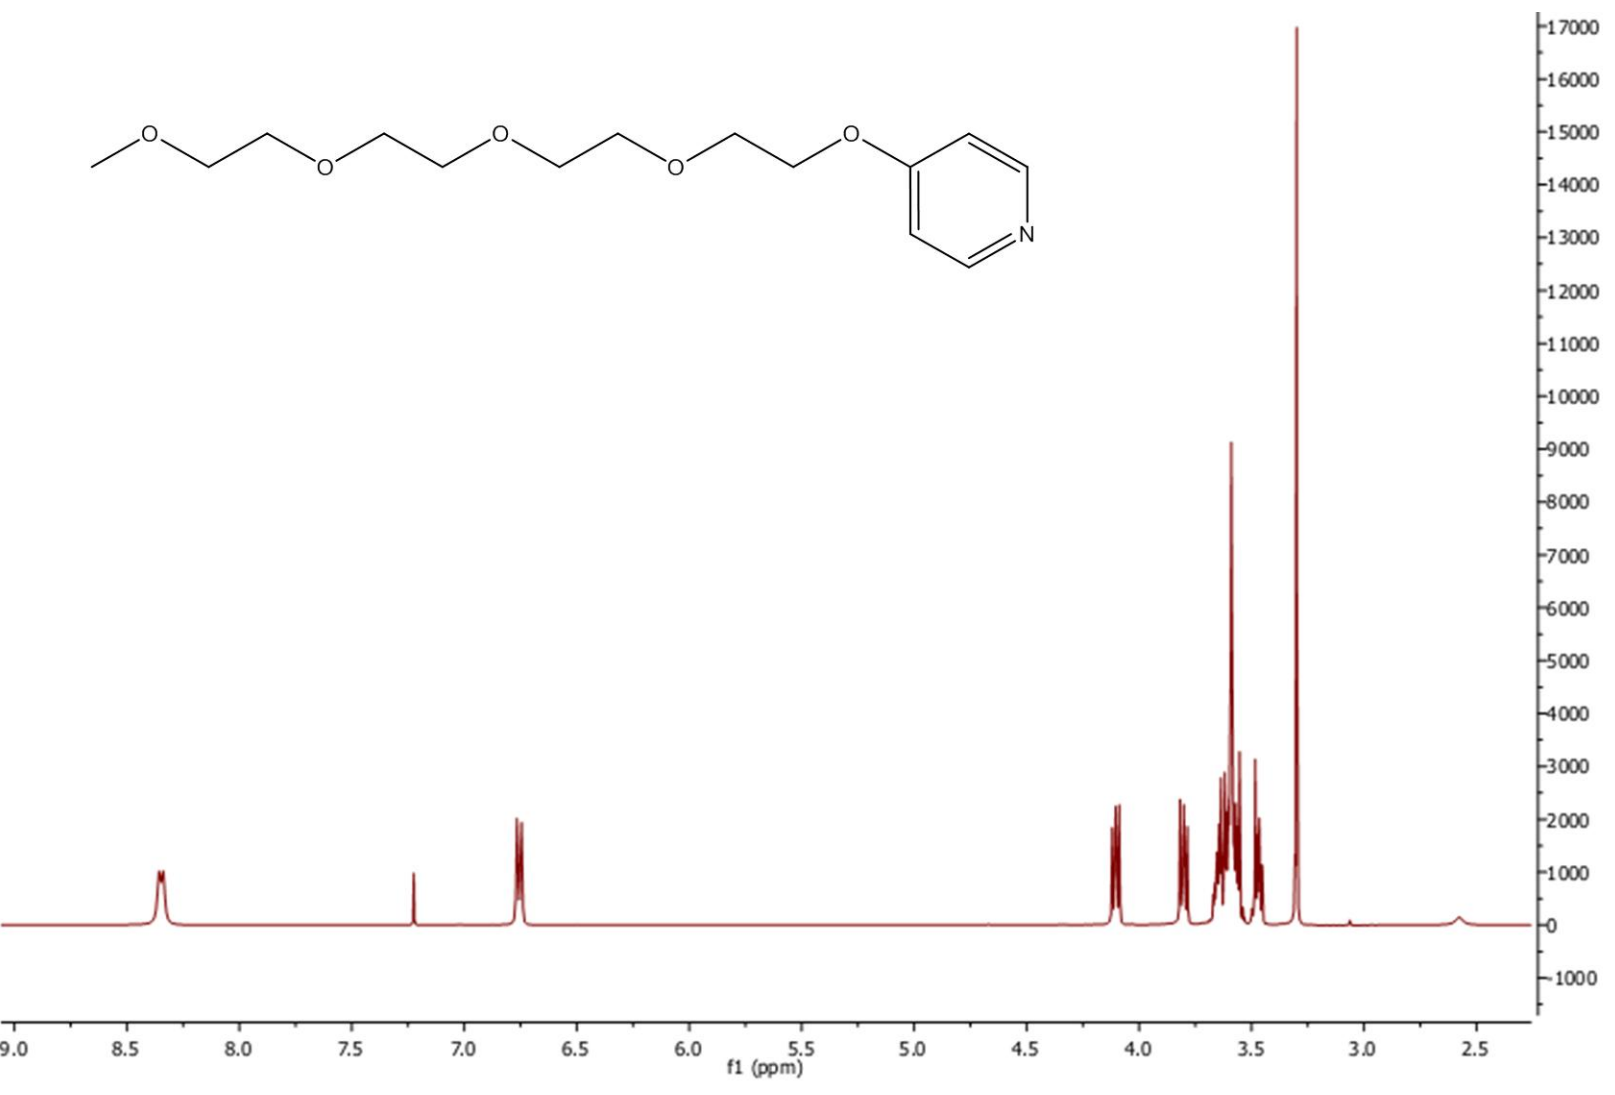

**Figure S5.**  $^1\text{H}$ NMR of compound **2** in  $\text{CDCl}_3$ .

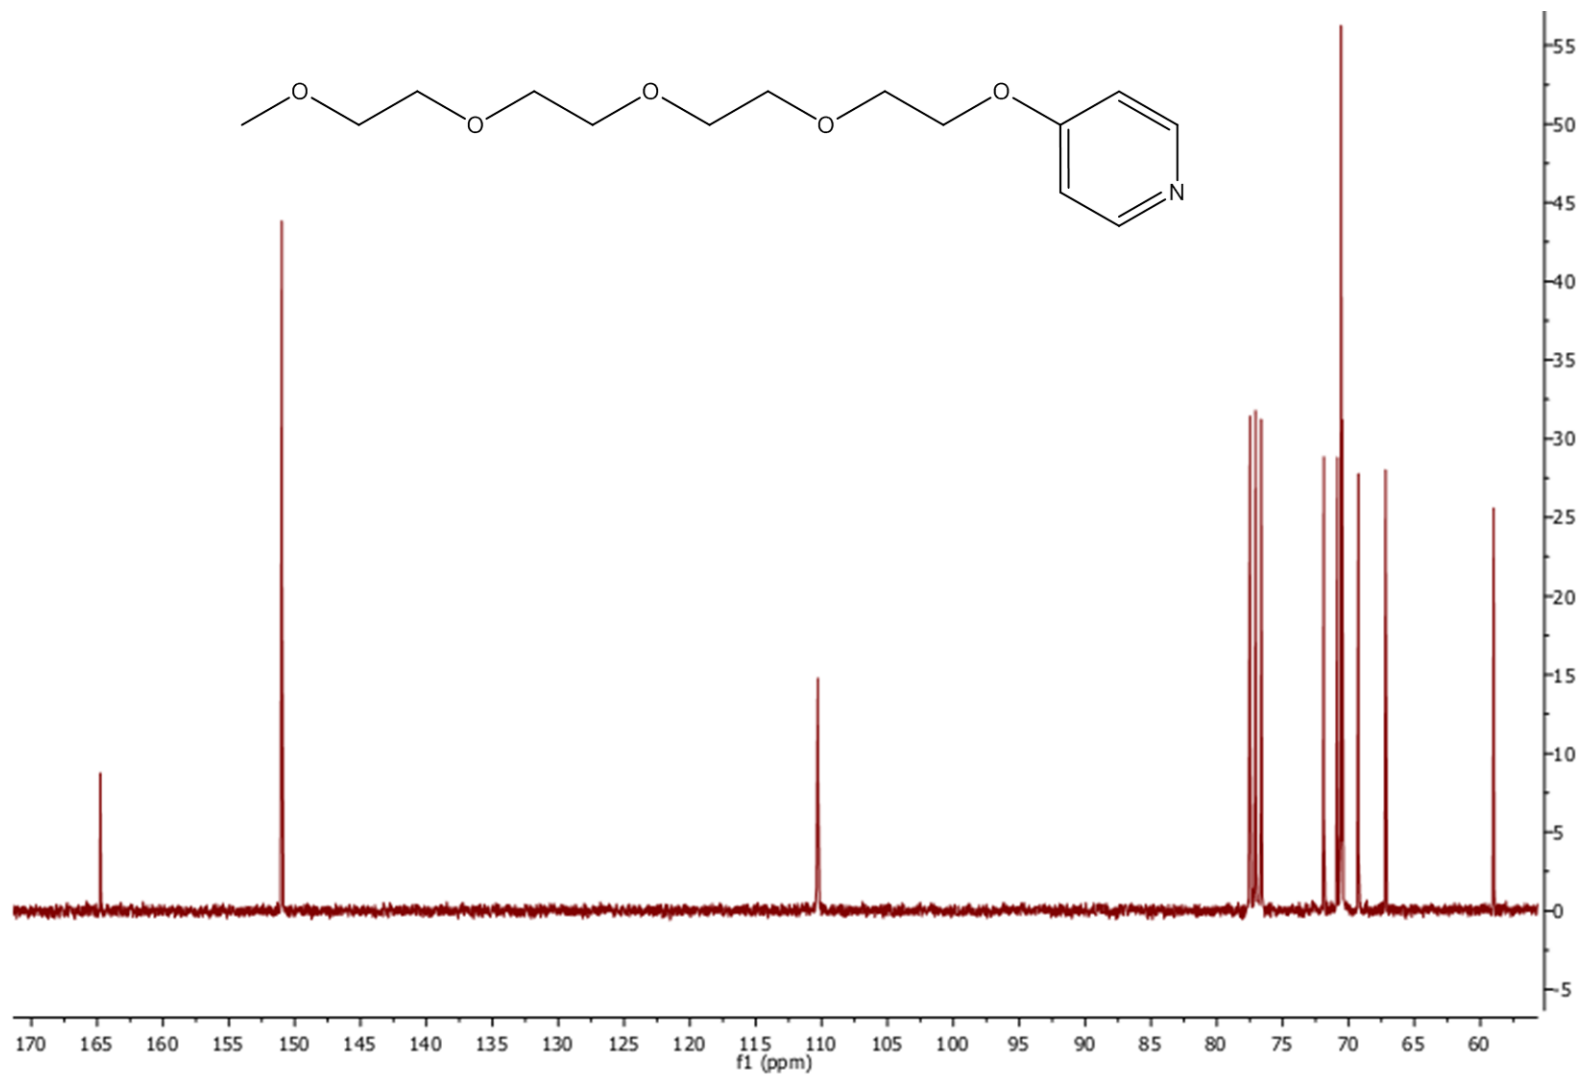

**Figure S6.**  $^{13}\text{C}$ NMR of compound **2** in  $\text{CDCl}_3$ .

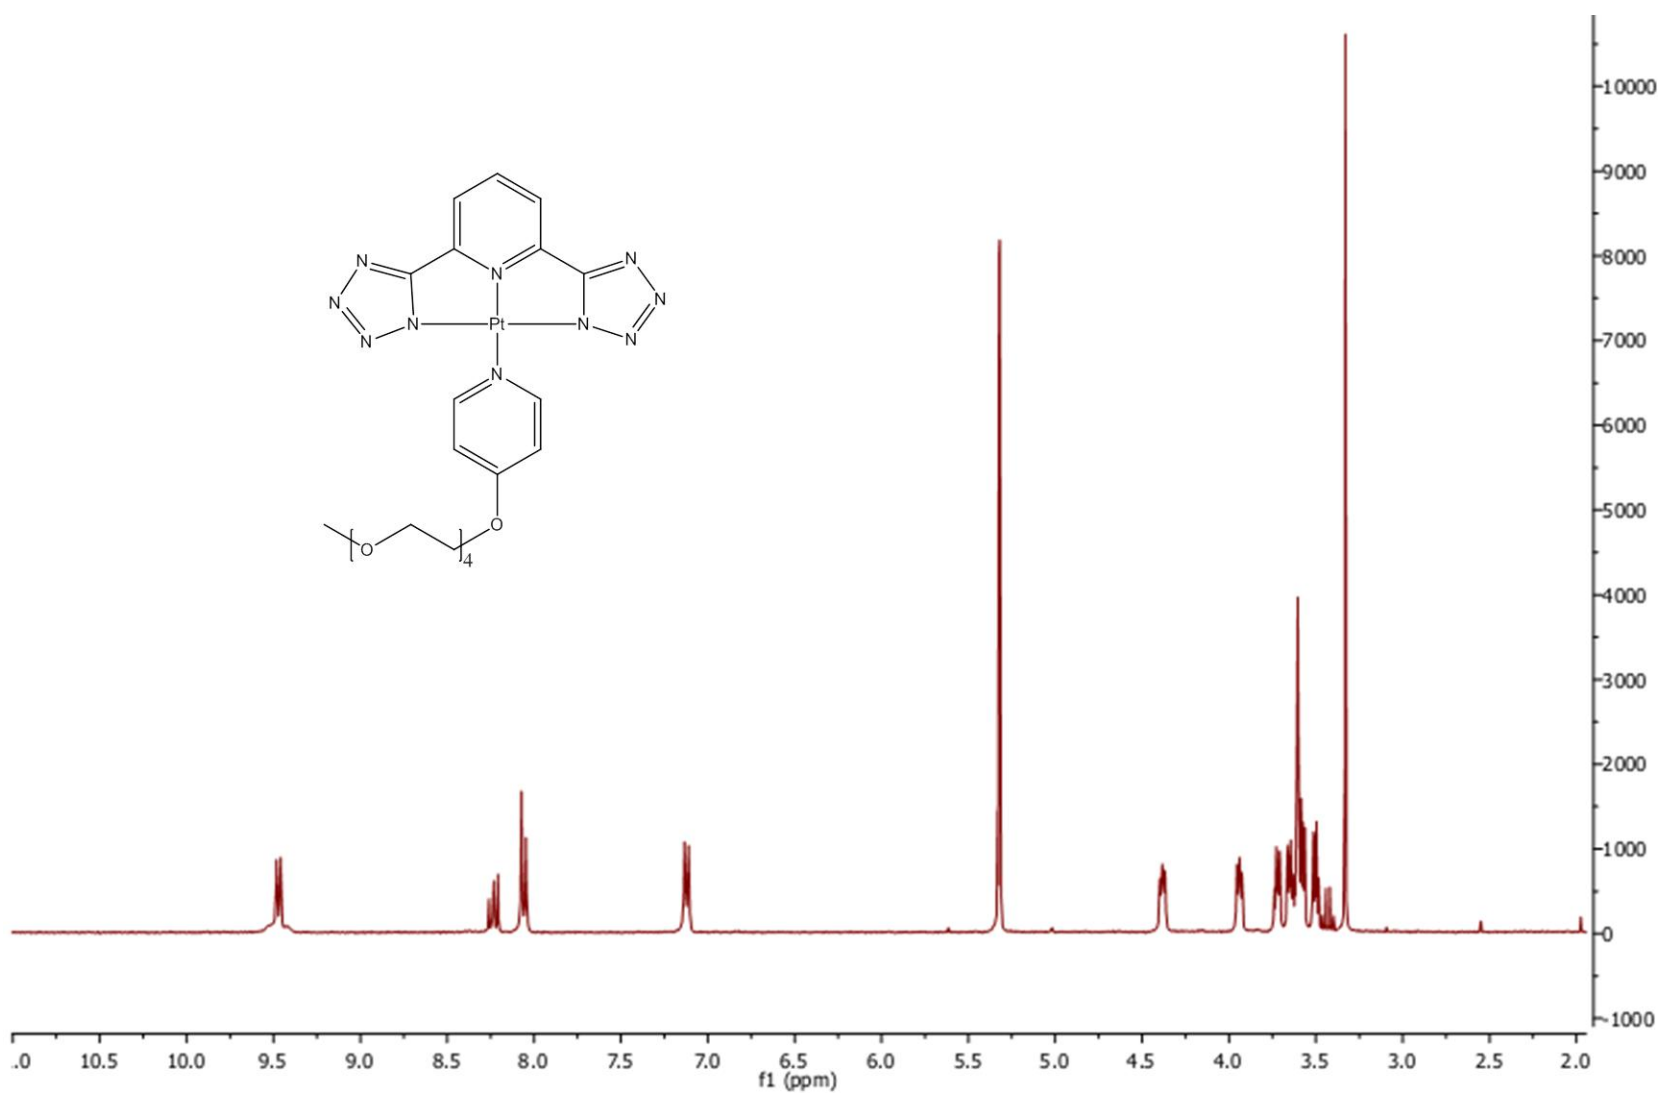

**Figure S7.**  $^1\text{H}$ NMR of complex **4** in  $\text{CD}_2\text{Cl}_2$ .
